# Supplementary material
Source: publisher site journal article supplement (https://www.dovepress.com/article/441312)
Supplement: Supplementary file 1 [file get_supplementary_file.php]

Table S1. Summary of antimicrobial susceptibility testing data for *C.* *difficile* isolates (N = 50).

| Number of Isolates (%) Inhibited at a MIC (μg/mL) of: | | | | | | | | | | | | |  |
| --- | --- | --- | --- | --- | --- | --- | --- | --- | --- | --- | --- | --- | --- |
| Antimicrobial agent | <0.0064 | 0.064-0.128 | 0.128-0.25 | 0.25-0.5 | 0.5-1 | 10-2.0 | 2.0-4.0 | 4.0-8.0 | 8.0-16.0 | 16.0-32.0 | 32.0-64.0 | 64.0-128 | >128 |
| Metronidazole | 3 (6%) | 11 (22%) | 16 (32%) | 2 (4%) | 1 (2%) | … | 1 (2%) | … | 1 (2%) | … | … | 2 (4%) | 13 (26%) |
| Vancomycin | 1 (2%) | 3 (6%) | 16 (32%) | 12 (24%) | 3 (6%) | 5 (10%) | 6 (12%) | 1 (2%) | … | … | … | 1 (2%) | 2 (4%) |
| Rifaximin | 38 (76%) | 2 (4%) | … | … | 2 (4%) | 3 (6%) | 3 (6%) | 2 (4%) | … | … | … | … | … |
| Rifampin | 34 (68%) | 2 (4%) | … | 1 (2%) | 2 (4%) | … | 5 (10%) | 5 (10%) | 1 (2%) | … | … | … | … |
| Meropenem | … | … | … | … | … | 5 (10%) | 12 (24%) | 5 (10%) | 14 (28%) | 10 (20%) | 2 (4%) | … | … |
| Ceftriaxone | … | … | … | … | … | … | … | … | … | … | … | 2 (4%) | 48 (96%) |
| Clindamycin | … | … | … | … | … | … | … | … | … | 2 (4%) | 4 (8%) | 20 (40%) | 24 (48%) |
| Erythromycin | 1 (2%) | … | … | … | 6 (12%) | 1 (2%) | … | … | … | 2 (4%) | … | … | 40 (80%) |
| Levofloxacin | … | … | … | … | … | 16 (32%) | 16 (32%) | 3 (6%) | 8 (16%) | 2 (4%) | … | 1 (2%) | 4 (8%) |
| Tetracycline | 2 (4%) | 3 (6%) | … | 4 (8%) | 1 (2%) | 3 (6%) | 3 (6%) | 4 (8%) | 5 (10%) | 7 (14%) | 15 (30%) | 3 (6%) | … |

MIC, minimum inhibitory concentration.

Table S2. Summary of the whole-genome sequencing data for *C. difficile* isolates.

| Isolates | Clean base pairs (bp) | Total scaffold | Total bases (bp) | Scaffold N50 (bp) | Scaffold N90 (bp) | G + C (%) | Predicted CDS |
| --- | --- | --- | --- | --- | --- | --- | --- |
| C001 | 1 340 218 354 | 145 | 4 106 440 | 62 330 | 19 040 | 28.2 | 3 883 |
| C002 | 893 719 249 | 108 | 4 283 519 | 106 248 | 21 820 | 28.7 | 3 816 |
| C003 | 980 839 748 | 149 | 4 260 289 | 58 062 | 16 898 | 28.6 | 3 713 |
| C004 | 989 422 828 | 196 | 4 082 749 | 54 012 | 13 068 | 28.8 | 3 885 |
| C005 | 1 070 770 887 | 165 | 4 320 784 | 77 511 | 19 879 | 29.2 | 3 906 |
| C006 | 1 395 871 890 | 117 | 4 145 170 | 72 583 | 21 558 | 29.1 | 3 936 |
| C007 | 898 530 353 | 119 | 4 157 443 | 85 954 | 20 259 | 28.9 | 3 801 |
| C008 | 2 216 805 335 | 140 | 4 178 612 | 96 932 | 24 139 | 29.0 | 3 668 |
| C009 | 957 769 200 | 73 | 4 105 000 | 149 761 | 46 111 | 28.7 | 3 745 |
| C010 | 951 489 276 | 122 | 4 239 383 | 82 248 | 19 807 | 29.0 | 3 738 |
| C011 | 899 617 391 | 172 | 4 247 277 | 64 258 | 14 111 | 28.8 | 3 868 |
| C012 | 2 769 015 213 | 41 | 4 193 586 | 299 351 | 106 470 | 28.7 | 3 573 |
| C013 | 6 753 136 300 | 64 | 4 222 496 | 278 473 | 51 335 | 28.9 | 3 854 |
| C014 | 2 878 036 823 | 35 | 4 075 675 | 256 243 | 90 421 | 28.4 | 3 926 |
| C015 | 1 060 335 840 | 66 | 4 306 976 | 186 286 | 47 713 | 28.6 | 3 784 |
| C016 | 866 348 156 | 60 | 4 177 729 | 267 254 | 86 956 | 28.3 | 4 138 |
| C017 | 1 649 914 925 | 53 | 4 140 197 | 226 106 | 97 631 | 28.7 | 3 886 |
| C018 | 1 335 976 242 | 51 | 4 251 034 | 224 950 | 104 446 | 28.5 | 3 795 |
| C019 | 1 538 509 890 | 37 | 4 233 168 | 223 321 | 103 223 | 28.1 | 3 610 |
| C020 | 1 361 637 657 | 36 | 4 228 938 | 275 502 | 98 299 | 28.7 | 3 785 |
| C021 | 3 631 260 783 | 40 | 4 176 630 | 333 846 | 76 203 | 28.9 | 3 796 |
| C022 | 762 757 958 | 44 | 4 234 271 | 237 103 | 55 922 | 28.4 | 3 650 |
| C023 | 903 833 910 | 42 | 4 040 576 | 342 599 | 104 656 | 28.3 | 3 802 |
| C024 | 963 263 427 | 37 | 4 207 766 | 245 368 | 83 088 | 28.5 | 3 944 |
| C025 | 2 961 603 519 | 49 | 4 254 407 | 256 284 | 61 130 | 28.9 | 3 794 |
| C026 | 1 048 487 052 | 31 | 4 052 208 | 261 677 | 118 717 | 28.3 | 3 939 |
| C027 | 1 276 424 805 | 43 | 4 207 787 | 255 476 | 90 342 | 28.8 | 3 728 |
| C028 | 1 752 408 357 | 48 | 4 224 348 | 225 078 | 84 027 | 28.7 | 3 648 |
| C029 | 1 503 089 134 | 28 | 4 079 687 | 448 661 | 135 380 | 28.3 | 3 890 |
| C030 | 743 833 654 | 43 | 4 204 187 | 199 097 | 66 341 | 28.4 | 3 855 |
| C031 | 1 548 323 521 | 62 | 4 275 232 | 242 556 | 62 763 | 28.6 | 3 959 |
| C032 | 974 635 862 | 38 | 4 154 739 | 311 405 | 113 015 | 28.8 | 4 020 |
| C033 | 976 306 513 | 33 | 4 348 801 | 277 074 | 115 828 | 28.4 | 3 867 |
| C034 | 4 667 280 011 | 46 | 4 254 047 | 206 097 | 60 892 | 28.6 | 3 840 |
| C035 | 3 116 408 782 | 39 | 4 253 842 | 240 127 | 90 421 | 28.4 | 3 854 |
| C036 | 7 043 182 767 | 50 | 4 174 316 | 202 752 | 91 431 | 28.6 | 3 763 |
| C037 | 1 007 817 821 | 52 | 4 233 569 | 199 232 | 80 814 | 28.4 | 3 778 |
| C038 | 937 405 655 | 79 | 4 266 108 | 167 089 | 58 652 | 28.4 | 3 832 |
| C039 | 1 170 635 258 | 64 | 4 173 782 | 189 098 | 65 149 | 28.4 | 3 643 |
| C040 | 1 921 032 135 | 36 | 4 225 726 | 277 903 | 70 906 | 28.3 | 3 903 |
| C041 | 1 148 105 959 | 88 | 4 291 729 | 185 838 | 48 465 | 29.3 | 3 721 |
| C042 | 1 921 818 248 | 46 | 4 139 264 | 283 306 | 108 324 | 28.5 | 3 909 |
| C043 | 921 040 437 | 40 | 4 125 864 | 252 515 | 76 629 | 28.2 | 3 889 |
| C044 | 1 328 952 826 | 49 | 4 099 639 | 296 981 | 65 535 | 28.4 | 3 952 |
| C045 | 1 046 992 997 | 44 | 4 176 773 | 221 614 | 56 488 | 28.9 | 3 797 |
| C046 | 904 761 597 | 44 | 4 207 775 | 196 423 | 67 440 | 28.5 | 3 860 |
| C047 | 2 042 182 688 | 994 | 4 222 013 | 8 937 | 2 370 | 28.8 | 3 840 |
| C048 | 1 309 612 562 | 50 | 4 290 101 | 239 237 | 49 925 | 28.6 | 3 770 |
| C049 | 1 612 428 124 | 54 | 4 269 667 | 194 520 | 55 001 | 28.7 | 3 722 |
| C050 | 2 996 268 234 | 86 | 4 302 411 | 213 834 | 40691 | 28.9 | 3 761 |
| SUM | 86 950 120 153 | – | – | – | – | – | 191 036 |
| AVERAGE | 1 739 002 403 | 87 | 4 202 475 | 207 182 | 65 595 | 28.6 | 3 820 |

CDS, coding sequence.

Table S3. Antibiotic resistance genes identified in *C. difficile* isolates (N = 50).

| Antibiotic Resistance Gene | Antibiotic Class | N (%) |
| --- | --- | --- |
| *AAC(6')-Ie-APH(2'')-Ia* | Aminoglycoside | 30 (60) |
| *aad(6)* | Aminoglycoside | 1 (2) |
| *ANT(6)-Ib* | Aminoglycoside | 8 (16) |
| *APH(2'')-If* | Aminoglycoside | 5 (10) |
| *APH(3')-IIIa* | Aminoglycoside | 1 (2) |
| *ErmB* | Erythromycin | 35 (70) |
| *cdeA* | Fluoroquinolone | 50 (100) |
| *vanRG* | Glycopeptide | 43 (86) |
| *ErmQ* | Lincosamide | 5 (10) |
| *lnuC* | Lincosamide | 1 (2) |
| *SAT-4* | Nucleoside | 1 (2) |
| *tetM* | Tetracycline | 23 (46) |
| *tetA(P)* | Tetracycline | 7 (14) |
| *tetB(P)* | Tetracycline | 7 (14) |
| *tetO* | Tetracycline | 1 (2) |
| *dfrF* | Trimethoprim | 2 (4) |
